# Supplementary material for: An Intranet of Things approach for adaptable control of behavioral and navigation-based experiments
Source: eLife. 2025 Feb 26;13:RP97433. doi: 10.7554/eLife.97433 (PMC11867614; doi:10.7554/eLife.97433)
Supplement: Figure 5—figure supplement 2—source data 1. [file elife-97433-fig5-figsupp2-data1.xlsx]

## Sheet: Table 1
∆ F/F Amplitude (Figure 5C)	F value	DOF	PR> F
Context (familiar vs. novel)	0.0037	(1, 5)	0.9537
Environment (VR vs Treadmill)	1.9387	(1, 5)	0.2226
Interaction	1.4364	(1, 5)	0.2844
∆ F/F Frequency (Figure 5D)	F value	DOF	PR> F
Context (familiar vs. novel)	0.0789	(1, 5)	0.7901
Environment (VR vs Treadmill)	4.3798	(1, 5)	0.0906
Interaction	0.21	(1, 5)	0.666
Sensitivity (Figure 5E)	F value	DOF	PR> F
Context (familiar vs. novel)	3.3375	(1, 5)	0.1273
Environment (VR vs Treadmill)	9.8469	(1, 5)	0.0257
Interaction	4.8578	(1, 5)	0.0787
Specificity (Figure 5F)	F value	DOF	PR> F
Context (familiar vs. novel)	2.5521	(1, 5)	0.171
Environment (VR vs Treadmill)	53.3198	(1, 5)	0.0008
Interaction	3.7118	(1, 5)	0.112
Spatial Information (Figure 5G)	F value	DOF	PR> F
Context (familiar vs. novel)	3.7945	(1, 5)	0.109
Environment (VR vs Treadmill)	0.7352	(1, 5)	0.4304
Interaction	2.3396	(1, 5)	0.1867
Velocity (Figure 5-Supplement 1C)	F value	DOF	PR> F
Context (familiar vs. novel)	0.1262	(1, 5)	0.7369
Environment (VR vs Treadmill)	35.9548	(1, 5)	0.0019
Interaction	2.7198	(1, 5)	0.16
